# Supplementary material for: Downscaling CMIP6 Global Solutions to Regional Ocean Carbon Model: Connecting the Mississippi, Gulf of Mexico, and Global Ocean
Source: Copernicus journal article supplement (doi:10.5194/bg-2021-339), 2021-12-17

# Supplementary Materials

Figure S1: Direct comparison between cruise underway  $p\text{CO}_2$  data (Obs) and model result (Model), the spatial distribution over twelve months.

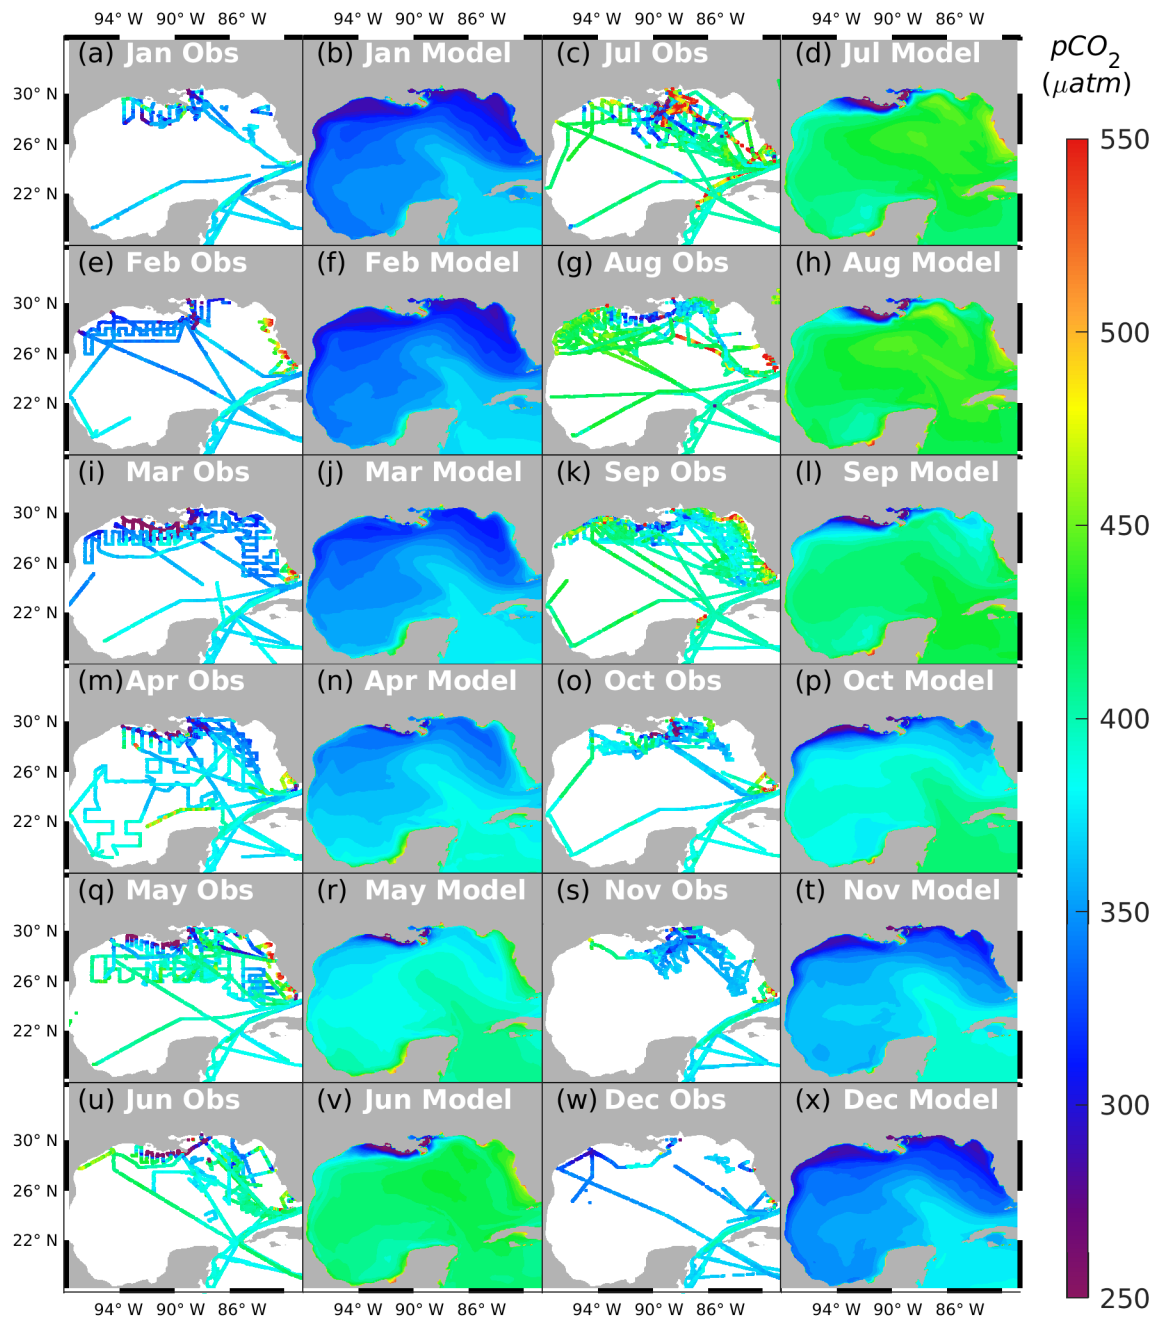

Figure S2: Direct comparison between cruise underway  $pCO_2$  data (data downloaded from <https://www.ncei.noaa.gov/access/oads/>) and model-simulated spatial means (daily mean with  $1\sigma$ ) over NGoM and Open GoM. Cruise data is monthly averaged, and its mean and one standard deviation are shown in the plot as black dots and grey bars, respectively.

10

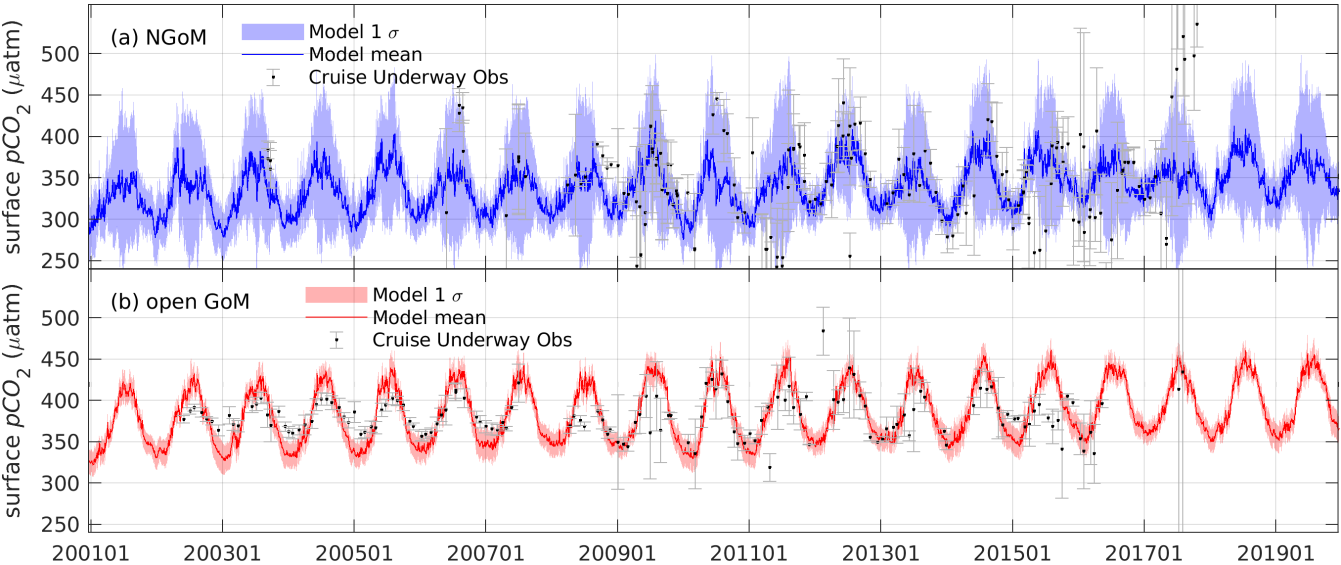

Supplement: Supplementary file 1 [file bg-2021-339-supplement.pdf]
